# Supplementary material
Source: PubMed Central journal article supplement (PMC2692997)
Supplement: NIHMS105684-supplement-SuppFigures.pdf [file NIHMS105684-supplement-SuppFigures.pdf]

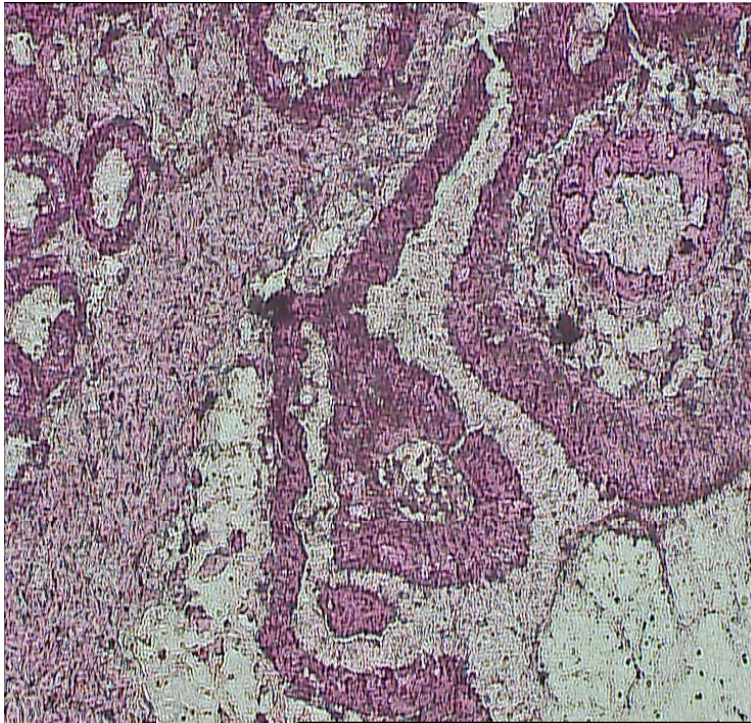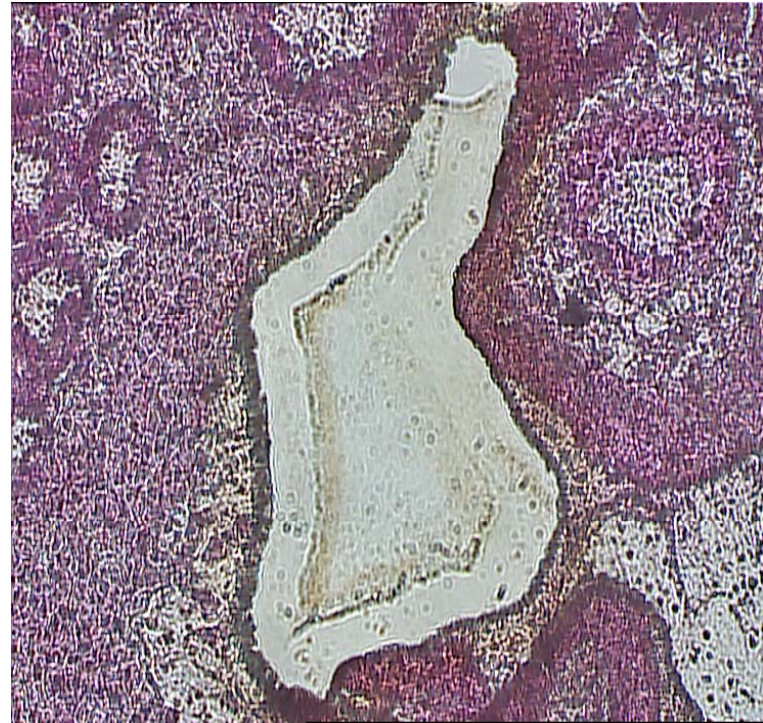

**Supplementary Figure 1**

**miR-155**

**miR-21**

**Scrambled**

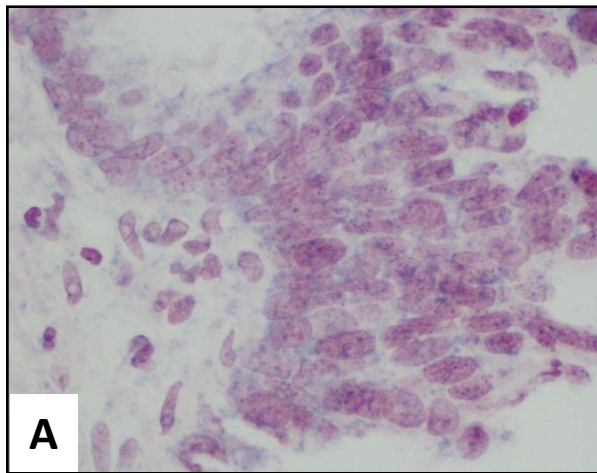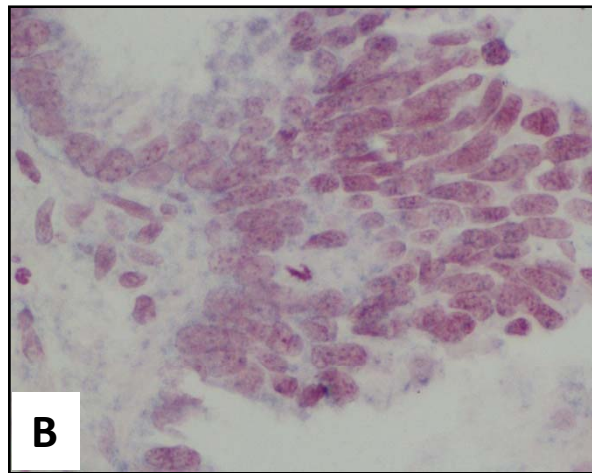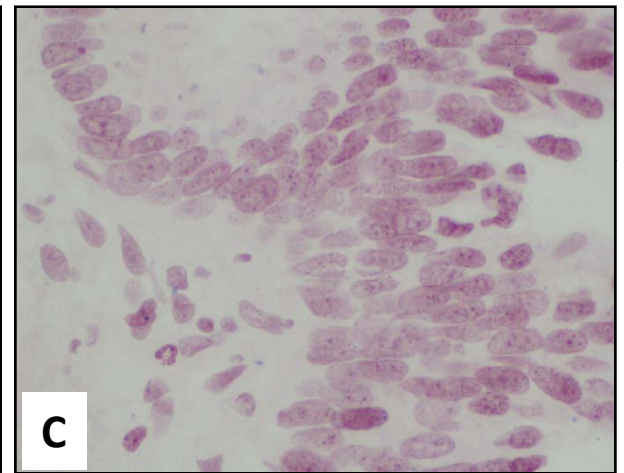

**Supplementary Figure 2**

**miR-155**

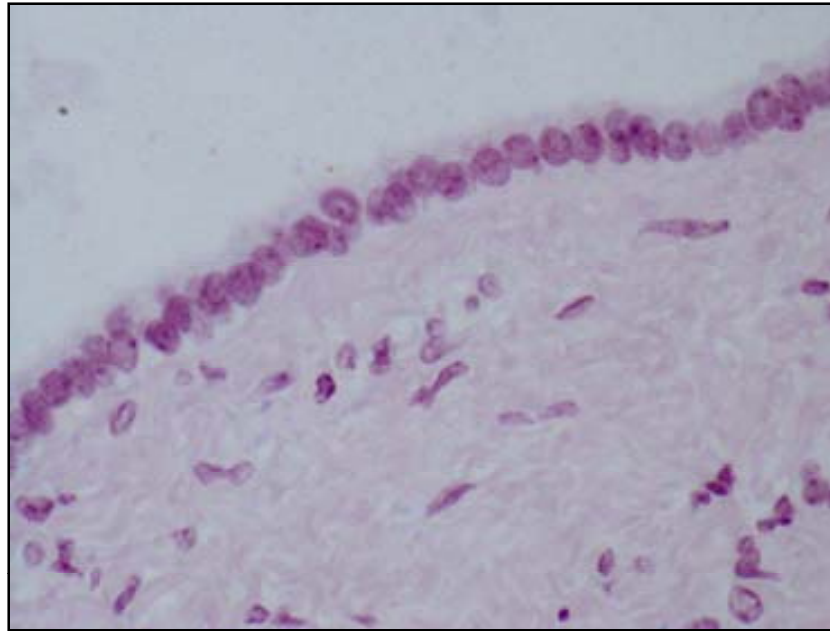

**miR-21**

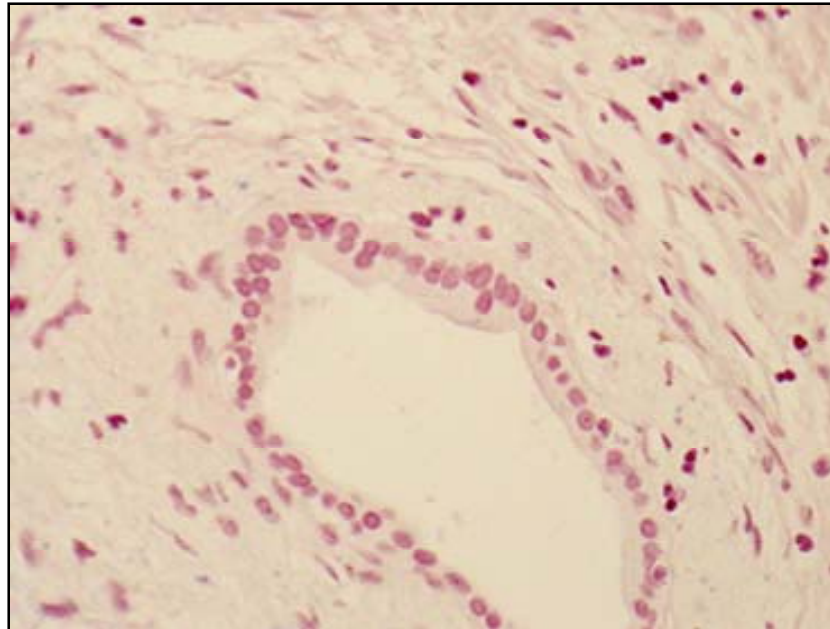

**Supplementary Figure 3**

**miR-155**

**Scrambled**

**Case 1**

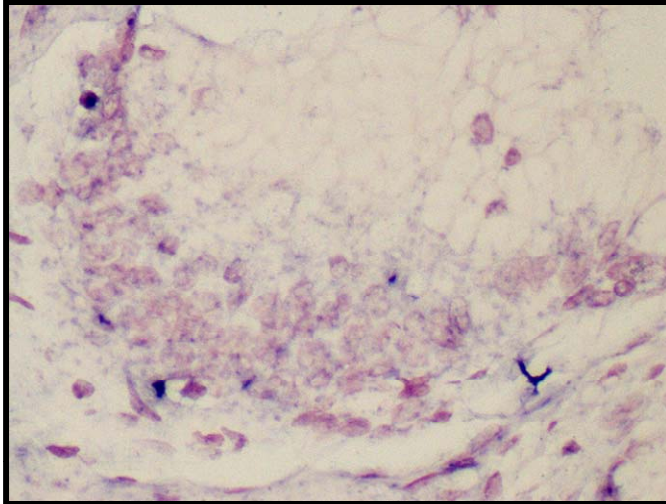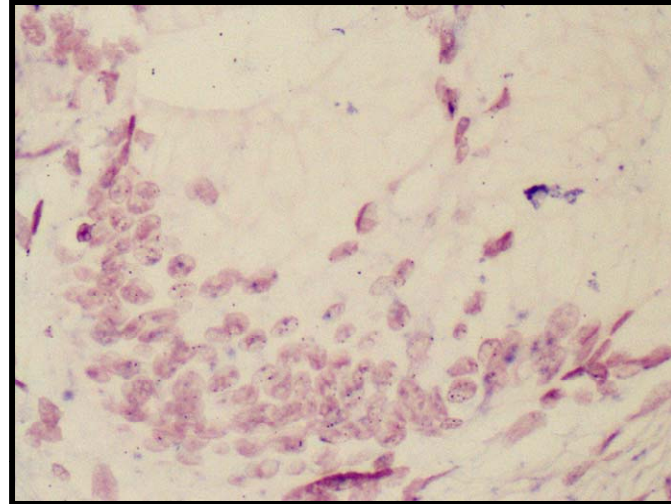

**Case 2**

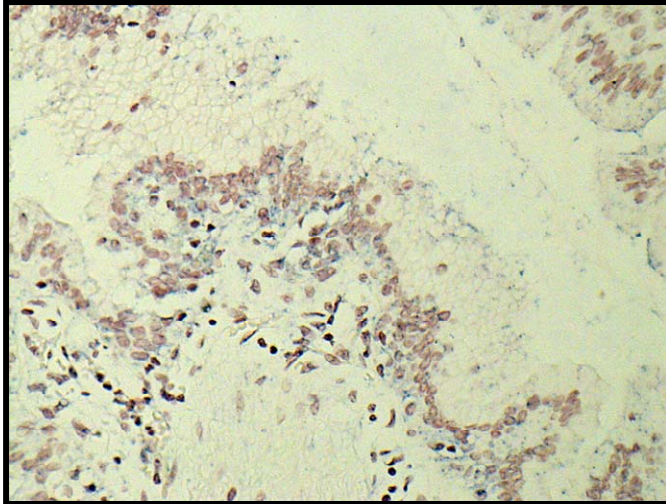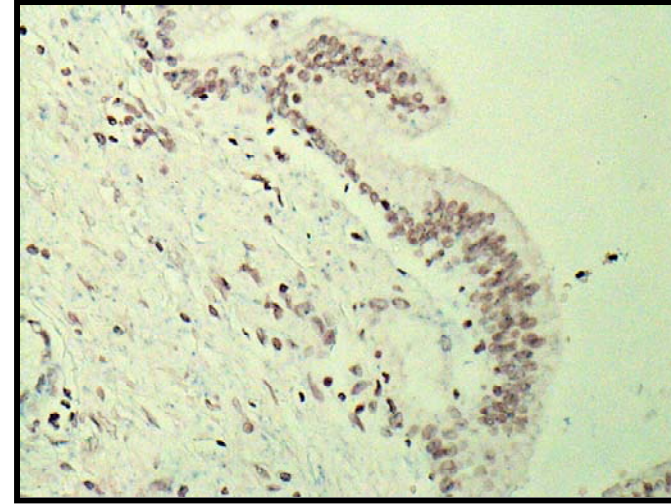

**Supplementary Figure 4**
